# Supplementary material for: A Novel Microfluidic Assay for Rapid Phenotypic Antibiotic Susceptibility Testing of Bacteria Detected in Clinical Blood Cultures
Source: PubMed Central journal article supplement (PMC5156554; doi:10.1371/journal.pone.0167356), 2016-12-14
Supplement: pone.0167356.s001.pdf [file pone.0167356.s001.pdf]

**S1 Table. MIC values for different inocula of VSSA and *P. aeruginosa* at different time points.**

MIC values (mg/L) as determined from the CellDirector 3D assay at 5, 4, 3, 2 and 1 h and percent agreement compared with the MIC determined at 5 h for (a) *S. aureus* with vancomycin and (b) *P. aeruginosa* with ciprofloxacin at different inocula.

a)

| <b>Inocula (CFU/mL)</b> | <b>5 hours</b> | <b>4 hours</b> | <b>%</b> | <b>3 hours</b> | <b>%</b> | <b>2 hours</b> | <b>%</b> | <b>1 hour</b> | <b>%</b> |
|-------------------------|----------------|----------------|----------|----------------|----------|----------------|----------|---------------|----------|
| 10 <sup>6</sup>         | 2.27           | 2.26           | 100%     | 2.44           | 107%     | 3.35           | 147%     | 0.00          | 0%       |
| 10 <sup>6</sup>         | 2.01           | 1.97           | 98%      | 2.12           | 105%     | 2.90           | 144%     | 0.00          | 0%       |
| 10 <sup>6</sup>         | 1.60           | 1.61           | 101%     | 1.74           | 109%     | 0.00           | 0%       | 0.00          | 0%       |
| 10 <sup>5</sup>         | 1.30           | 1.37           | 105%     | 1.64           | 126%     | 2.18           | 168%     | 0.00          | 0%       |
| 10 <sup>5</sup>         | 1.98           | 1.06           | 53%      | 1.37           | 69%      | 0.00           | 0%       | 0.00          | 0%       |
| 10 <sup>5</sup>         | 0.90           | 0.95           | 105%     | 1.17           | 130%     | 0.00           | 0%       | 0.00          | 0%       |
| 10 <sup>4</sup>         | 0.80           | 0.84           | 105%     | 0.00           | 0%       | 0.00           | 0%       | 0.00          | 0%       |
| 10 <sup>4</sup>         | 0.72           | 0.62           | 86%      | 0.00           | 0%       | 0.00           | 0%       | 0.00          | 0%       |
| 10 <sup>4</sup>         | 0.60           | 0.00           | 0%       | 0.00           | 0%       | 0.00           | 0%       | 0.00          | 0%       |
| 10 <sup>3</sup>         | 0.00           | 0.00           | -        | 0.00           | -        | 0.00           | -        | 1.69          | -        |
| 10 <sup>3</sup>         | -              | -              | -        | -              | -        | -              | -        | -             | -        |
| 10 <sup>3</sup>         | -              | -              | -        | -              | -        | -              | -        | -             | -        |

b)

| <b>Inocula (CFU/mL)</b> | <b>5 hours</b> | <b>4 hours</b> | <b>%</b> | <b>3 hours</b> | <b>%</b> | <b>2 hours</b> | <b>%</b> | <b>1 hour</b> | <b>%</b> |
|-------------------------|----------------|----------------|----------|----------------|----------|----------------|----------|---------------|----------|
| 10 <sup>6</sup>         | 0.32           | 0.30           | 95%      | 0,00           | 0%       | 0              | 0%       | 0             | 0%       |
| 10 <sup>6</sup>         | 0.36           | 0.34           | 94%      | 0.34           | 94%      | 0.34           | 93%      | 0             | 0%       |
| 10 <sup>6</sup>         | 0.25           | 0.23           | 94%      | 0.23           | 93%      | 0.25           | 101%     | 0             | 0%       |
| 10 <sup>5</sup>         | 0.38           | 0.35           | 91%      | 0.10           | 27%      | 0              | 0%       | 0             | 0%       |
| 10 <sup>5</sup>         | 0.37           | 0.35           | 93%      | 0              | 0%       | 0              | 0%       | 0             | 0%       |
| 10 <sup>5</sup>         | 0.41           | 0.38           | 93%      | 0.35           | 85%      | 0              | 0%       | 0             | 0%       |
| 10 <sup>4</sup>         | 0.28           | 0.12           | 43%      | 0              | 0%       | 0              | 0%       | 0             | 0%       |
| 10 <sup>4</sup>         | 0.26           | 0.19           | 73%      | 0              | 0%       | 0              | 0%       | 0             | 0%       |
| 10 <sup>4</sup>         | 0.32           | 0              | 0%       | 0              | 0%       | 0              | 0%       | 0             | 0%       |
| 10 <sup>3</sup>         | -              | -              | -        | -              | -        | -              | -        | -             | -        |
| 10 <sup>3</sup>         | -              | -              | -        | -              | -        | -              | -        | -             | -        |
| 10 <sup>3</sup>         | -              | -              | -        | -              | -        | -              | -        | -             | -        |
