# Supplementary material for: A Novel Microfluidic Assay for Rapid Phenotypic Antibiotic Susceptibility Testing of Bacteria Detected in Clinical Blood Cultures
Source: PubMed Central journal article supplement (PMC5156554; doi:10.1371/journal.pone.0167356), 2016-12-14
Supplement: pone.0167356.s002.pdf [file pone.0167356.s002.pdf]

**S2 Table. MIC values of quality control strains at different time points.**

MIC values (mg/L) as determined from the CellDirector 3D assay at 5, 4, 3, 2 and 1 h and percent agreement compared with the MIC determined at 5 h for *P. aeruginosa* with ceftazidime, *E. coli* with ciprofloxacin, ceftazidime and tigecycline and *K. pneumoniae* with ciprofloxacin.

|                                       | 5 hours | 4 hours | %    | 3 hours | %    | 2 hours | %    | 1 hour | %  |
|---------------------------------------|---------|---------|------|---------|------|---------|------|--------|----|
| <i>P. aeruginosa</i><br>ceftazidime   | 0.94    | 1.2     | 125% | 0       | 0%   | 0       | 0%   | 0      | 0% |
|                                       | 1.0     | 1.2     | 118% | 0       | 0%   | 0       | 0%   | 0      | 0% |
|                                       | 1.0     | 1.3     | 122% | 0       | 0%   | 0       | 0%   | 0      | 0% |
| <i>E. coli</i><br>ciprofloxacin       | 0.012   | 0.010   | 88%  | 0.0087  | 75%  | 0       | 0%   | 0      | 0% |
|                                       | 0.014   | 0.011   | 77%  | 0.011   | 76%  | 0       | 0%   | 0      | 0% |
|                                       | 0.011   | 0.011   | 94%  | 0.017   | 157% | 0       | 0%   | 0      | 0% |
| <i>E. coli</i><br>ceftazidime         | 0.060   | 0.085   | 141% | 0.19    | 312% | 0       | 0%   | 0      | 0% |
|                                       | 0.12    | 0.14    | 113% | 0.17    | 141% | 0       | 0%   | 0      | 0% |
|                                       | 0.14    | 0.16    | 114% | 0.20    | 143% | 0       | 0%   | 0      | 0% |
| <i>E. coli</i><br>tigecycline         | 0.14    | 0.13    | 97%  | 0.12    | 90%  | 0       | 0%   | 0      | 0% |
|                                       | 0.14    | 0.12    | 85%  | 0.10    | 72%  | 0       | 0%   | 0      | 0% |
|                                       | 0.11    | 0.11    | 97%  | 0.090   | 81%  | 0       | 0%   | 0      | 0% |
| <i>K. pneumoniae</i><br>ciprofloxacin | 0.0025  | 0.0020  | 77%  | 0.0050  | 199% | 0       | 275% | 0      | 0% |
|                                       | 0.0065  | 0.0048  | 74%  | 0.0037  | 57%  | 0.0045  | 70%  | 0      | 0% |
|                                       | 0.0049  | 0.0045  | 92%  | 0.0063  | 128% | 0       | 0%   | 0      | 0% |
