# Supplementary material for: A Novel Microfluidic Assay for Rapid Phenotypic Antibiotic Susceptibility Testing of Bacteria Detected in Clinical Blood Cultures
Source: PubMed Central journal article supplement (PMC5156554; doi:10.1371/journal.pone.0167356), 2016-12-14
Supplement: pone.0167356.s003.pdf [file pone.0167356.s003.pdf]

**S3 Table. MIC values for VSSA and hVISA at different time points.**

MIC values (mg/L) as determined from the CellDirector 3D assay at 5, 4, 3, 2 and 1h and percent agreement compared to the MIC determined at 5h for *S. aureus* VSSA and hVISA (from pure cultures and spiked blood cultures) with vancomycin.

|       | Sample | 4 hours | 3 hours | %    | 2 hours | %    | 1 hour | %  |
|-------|--------|---------|---------|------|---------|------|--------|----|
| VSSA  | pure   | 1.3     | 1.6     | 120% | 0       | 0%   | 0      | 0% |
|       |        | 0.86    | 1.2     | 136% | 0       | 0%   | 0      | 0% |
|       |        | 1.1     | 1.4     | 127% | 1.8     | 169% | 0      | 0% |
|       | blood  | 1.4     | 1.5     | 110% | 2.1     | 156% | 0      | 0% |
|       |        | 0.93    | 1.1     | 114% | 1.4     | 149% | 0      | 0% |
|       |        | 1.2     | 1.3     | 106% | 1.7     | 139% | 0      | 0% |
| hVISA | pure   | 2.9     | 3.1     | 109% | 0       | 0%   | 0      | 0% |
|       |        | 2.5     | 2.9     | 120% | 0       | 0%   | 0      | 0% |
|       |        | 1.9     | 2.3     | 122% | 0       | 0%   | 0      | 0% |
|       | blood  | 2.5     | 0       | 0%   | 0       | 0%   | 0      | 0% |
|       |        | 2.3     | 2.4     | 107% | 0       | 0%   | 0      | 0% |
|       |        | 1.74    | 1.8     | 104% | 0       | 0%   | 0      | 0% |
