# Supplementary material for: A Novel Microfluidic Assay for Rapid Phenotypic Antibiotic Susceptibility Testing of Bacteria Detected in Clinical Blood Cultures
Source: PubMed Central journal article supplement (PMC5156554; doi:10.1371/journal.pone.0167356), 2016-12-14
Supplement: pone.0167356.s004.pdf [file pone.0167356.s004.pdf]

**S4 Table. MIC values from CellDirector 3D and Etest for quality control strains.**

MIC values for QC strains determined by Etest and CellDirector 3D from pure cultures at the optimal inoculum size.

| Species, antibiotic                  | Replicate | Etest      | CellDirector 3D |                      |                     |
|--------------------------------------|-----------|------------|-----------------|----------------------|---------------------|
|                                      |           | MIC (mg/L) | MIC (mg/L)      | Mean MIC (SD) (mg/L) | Inoculum (CFU/mL)   |
| <i>S. aureus</i> (VSSA), vancomycin  | 1         | 1.5        | 1.30            | 1.4 (0.45)           | 5.0·10 <sup>5</sup> |
|                                      | 2         | 1.5        | 1.98            |                      | 2.8·10 <sup>5</sup> |
|                                      | 3         | 1.5        | 0.90            |                      | 2.2·10 <sup>5</sup> |
| <i>P. aeruginosa</i> , ciprofloxacin | 1         | 0.25       | 0.38            | 0.39 (0.014)         | 1.1·10 <sup>6</sup> |
|                                      | 2         | 0.125      | 0.37            |                      | 1.6·10 <sup>6</sup> |
|                                      | 3         | 0.19       | 0.41            |                      | 4.2·10 <sup>5</sup> |
|                                      | 4         | 0.19       |                 |                      |                     |
| <i>P. aeruginosa</i> , ceftazidime   | 1         | 1          | 0.94            | 1.0 (0.050)          | 7.2·10 <sup>5</sup> |
|                                      | 2         | 1          | 1.0             |                      | 9.0·10 <sup>5</sup> |
|                                      | 3         | 0.75       | 1.0             |                      | 8.4·10 <sup>5</sup> |
| <i>E. coli</i> , ciprofloxacin       | 1         | 0.008      | 0.012           | 0.013 (0.0014)       | 2.6·10 <sup>5</sup> |
|                                      | 2         | 0.006      | 0.014           |                      | 3.3·10 <sup>5</sup> |
|                                      | 3         | 0.008      | 0.011           |                      | 4.7·10 <sup>5</sup> |
| <i>E. coli</i> , ceftazidime         | 1         | 0.19       | 0.060           | 0.11 (0.034)         | 4.1·10 <sup>5</sup> |
|                                      | 2         | 0.125      | 0.12            |                      | 3.2·10 <sup>5</sup> |
|                                      | 3         | 0.19       | 0.14            |                      | 3.3·10 <sup>5</sup> |
| <i>E. coli</i> , tigecycline         | 1         | 0.094      | 0.14            | 0.13 (0.013)         | 4.6·10 <sup>5</sup> |
|                                      | 2         | 0.19       | 0.14            |                      | 3.8·10 <sup>5</sup> |
|                                      | 3         | 0.125      | 0.11            |                      | 4.5·10 <sup>5</sup> |
|                                      | 4         | 0.19       |                 |                      |                     |
| <i>K. pneumoniae</i> , ciprofloxacin | 1         | 0.008      | 0.0025          | 0.0046 (0.0016)      | 4.4·10 <sup>5</sup> |
|                                      | 2         | 0.004      | 0.0065          |                      | 4.2·10 <sup>5</sup> |
|                                      | 3         | 0.006      | 0.0049          |                      | 4.2·10 <sup>5</sup> |
|                                      | 4         | 0.006      |                 |                      |                     |
