# Supplementary material for: A Novel Microfluidic Assay for Rapid Phenotypic Antibiotic Susceptibility Testing of Bacteria Detected in Clinical Blood Cultures
Source: PubMed Central journal article supplement (PMC5156554; doi:10.1371/journal.pone.0167356), 2016-12-14
Supplement: pone.0167356.s005.pdf [file pone.0167356.s005.pdf]

**S5 Table. MIC values from CellDirector 3D, Etest and macrodilution for VSSA and hVISA.**

MIC values for VSSA and hVISA strains determined by CellDirector 3D, Etest and

Macrodilution from pure cultures and from spiked blood culture bottles.

|       | Replicate<br># | Etest | Macrodilution | CellDirector 3D |            |
|-------|----------------|-------|---------------|-----------------|------------|
|       |                |       |               | without blood   | with blood |
| VSSA  | 1              | 1.5   | 0.5           | 1.3             | 1.4        |
|       | 2              | 1.5   | 1             | 0.86            | 0.93       |
|       | 3              | 1.5   | 1             | 1.1             | 1.2        |
| hVISA | 1              | 2     | 1             | 2.9             | 2.5        |
|       | 2              | 2     | 2             | 2.5             | 2.3        |
|       | 3              | 2     | 2             | 1.9             | 1.7        |
