# Supplementary material for: A Novel Microfluidic Assay for Rapid Phenotypic Antibiotic Susceptibility Testing of Bacteria Detected in Clinical Blood Cultures
Source: PubMed Central journal article supplement (PMC5156554; doi:10.1371/journal.pone.0167356), 2016-12-14
Supplement: pone.0167356.s006.pdf [file pone.0167356.s006.pdf]

**S6 Table. Recovery of bacteria from spiked blood bottles.** Percent recovery and bacterial concentrations before and after centrifugation of spiked blood bottles.

|           | <b>Before<br/>(CFU/mL)</b> | <b>After<br/>(CFU/mL)</b> | <b>Recovery<br/>(%)</b> |
|-----------|----------------------------|---------------------------|-------------------------|
| VSSA      | $4.4 \cdot 10^6$           | $2.4 \cdot 10^6$          | 56                      |
|           | $4.3 \cdot 10^6$           | $1.3 \cdot 10^6$          | 30                      |
|           | $2.9 \cdot 10^6$           | $2.3 \cdot 10^6$          | 78                      |
| hVISA     | $1.0 \cdot 10^7$           | $2.4 \cdot 10^6$          | 24                      |
|           | $8.6 \cdot 10^6$           | $1.8 \cdot 10^6$          | 21                      |
|           | $7.3 \cdot 10^6$           | $3.6 \cdot 10^6$          | 49                      |
| Mean (SD) |                            |                           | 43 (20)                 |
