# Supplementary material for: A Novel Microfluidic Assay for Rapid Phenotypic Antibiotic Susceptibility Testing of Bacteria Detected in Clinical Blood Cultures
Source: PubMed Central journal article supplement (PMC5156554; doi:10.1371/journal.pone.0167356), 2016-12-14
Supplement: pone.0167356.s007.pdf [file pone.0167356.s007.pdf]

**S7 Table. Recovery of bacteria from clinical blood bottles.** Percent recovery and bacterial concentrations before and after centrifugation of clinical blood bottles.

| Isolate Nr. | Before<br>(CFU/mL) | After<br>(CFU/mL) | Recovery<br>(%) |
|-------------|--------------------|-------------------|-----------------|
| 1           | $9.4 \cdot 10^8$   | $9.7 \cdot 10^7$  | 10              |
| 2           | $1.1 \cdot 10^8$   | $4.5 \cdot 10^7$  | 41              |
| 3           | $1.2 \cdot 10^9$   | $1.7 \cdot 10^8$  | 14              |
| 4           | $1.7 \cdot 10^9$   | $1.5 \cdot 10^7$  | 1               |
| 5           | $1.9 \cdot 10^8$   | $8.1 \cdot 10^6$  | 4               |
| 6           | $5.9 \cdot 10^7$   | $4.6 \cdot 10^6$  | 8               |
| 7           | $8.6 \cdot 10^7$   | $8.9 \cdot 10^7$  | 104             |
| 8           | $5.3 \cdot 10^8$   | $6.5 \cdot 10^7$  | 12              |
| 9           | $3.6 \cdot 10^7$   | $1.5 \cdot 10^7$  | 41              |
| 10          | $2.7 \cdot 10^7$   | $2.8 \cdot 10^6$  | 10              |
| 11          | $1.9 \cdot 10^8$   | $1.8 \cdot 10^7$  | 9               |
| 12          | $5.2 \cdot 10^7$   | $5.1 \cdot 10^7$  | 96              |
| 13          | $1.6 \cdot 10^8$   | $1.2 \cdot 10^7$  | 8               |
| Mean (SD)   |                    |                   | 28 (33)         |
